# Supplementary material
Source: PubMed Central journal article supplement (PMC5007779)
Supplement: AEM.00620-16_zam999117392so1.pdf [file AEM.00620-16_zam999117392so1.pdf]

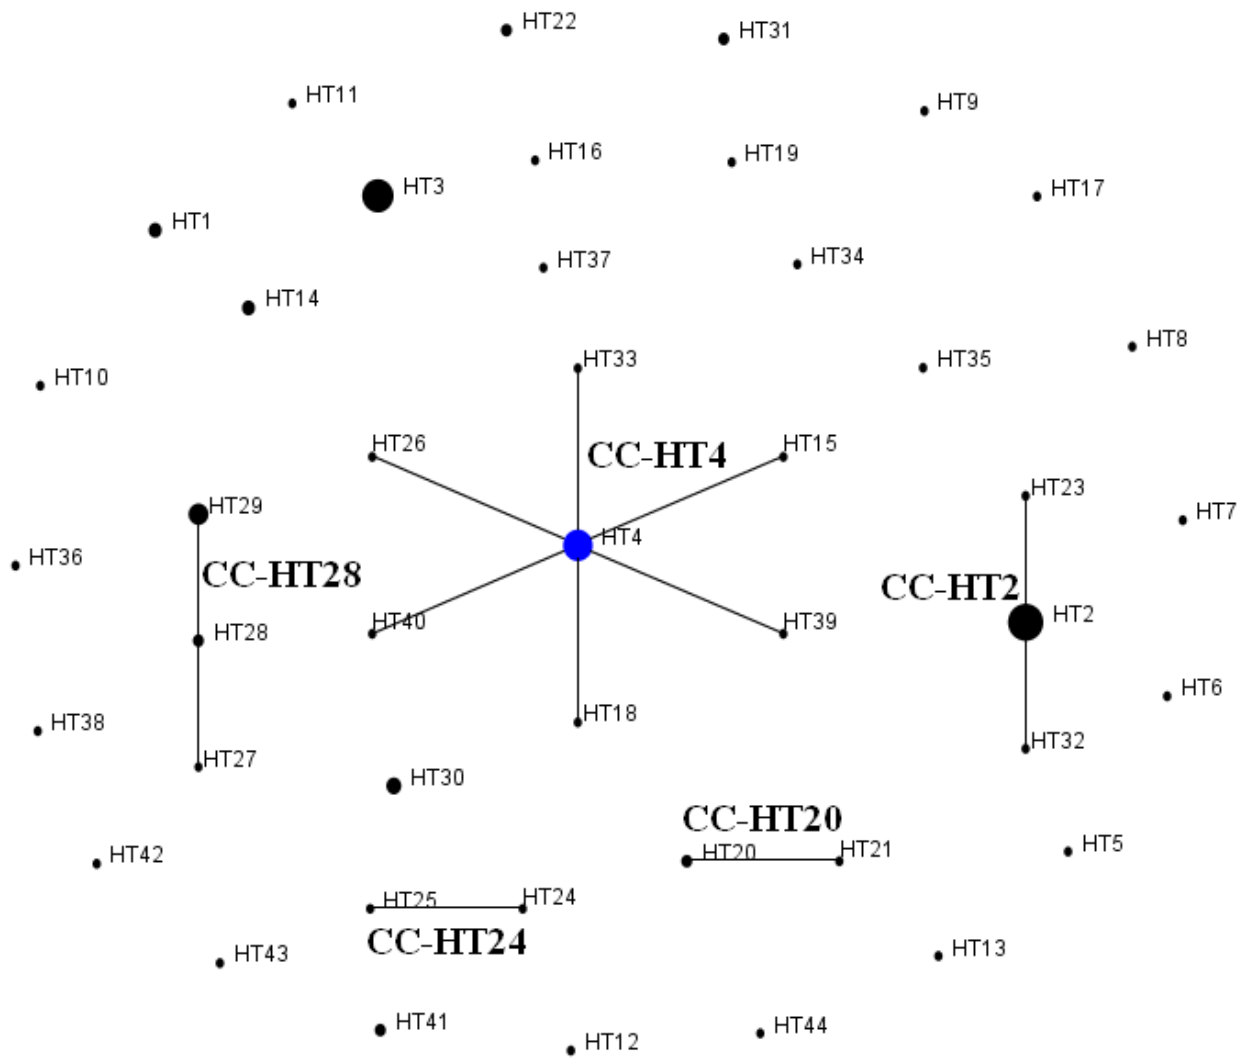

**Supplementary figure 1.** An eburst<sub>v3</sub> derived diagram showing “a population snapshot” of 103 *Vibrio anguillarum* (and 13 previously *Vibrio ordalii* identified) isolates from diverse origins (fish host species and countries). The isolates comprise 44 haplotypes (HTs) either as 27 singletons or belonging to 5 clonal complexes (CCs). The stringent group definition is 7 out of 8 identical loci and the clonal complexes (CC-HT2, CC-HT4, CC-HT28) are named after the predicted HT founder or otherwise the HT with the lowest number (CC-HT20 and CC-HT24). Seven singletons comprises more than one isolate - HT1 (4 isolates), HT3 (18 isolates), HT14 (3 isolates), HT22 (2 isolates), HT30 (4 isolates), HT31 (2 isolates) and HT41 (2 isolates).

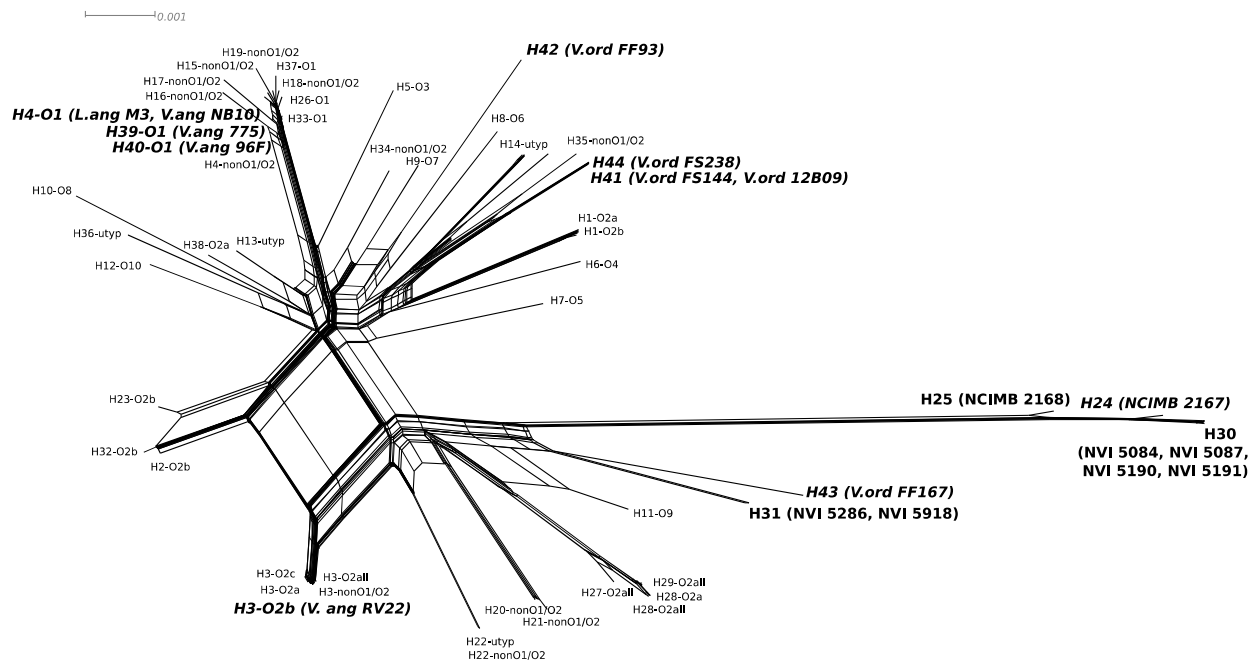

**Supplementary figure 2.** A phylogenetic network, made with the Splits tree4 neighbor-net algorithm applying the uncorrected p-distance method, based on 5208 bp concatenated partial sequences (from 8 loci) in 103 *Vibrio anguillarum* (and 13 previously *Vibrio ordalii* identified) isolates from diverse origins (fish host species and countries). All observed haplotype (H)-serotype combinations are represented. The full-genome sequenced *V. anguillarum* strains and the 13 isolates previously identified as *V. ordalii* are highlighted in bold. The reticulated structure between the 44 haplotypes is indicative of horizontal gene transfer/recombination. Likely recombination was supported by the implemented PHI test.

| name         | host                     | species  | country | ATatpA | ATftsZ | ATgapA | ATgyrB | ATmreB | ATpyrH | ATrpoA | ATtopA | sum AT          | HT |
|--------------|--------------------------|----------|---------|--------|--------|--------|--------|--------|--------|--------|--------|-----------------|----|
| I14_02       | Gadus morhua             | Scotland |         | 1      | 1      | 2      | 2      | 2      | 2      | 2      | 1      | 11222221        | 2  |
| 820723       | unknown                  | Denmark  |         | 1      | 1      | 1      | 1      | 1      | 1      | 1      | 1      | 11111111        | 1  |
| 860708_6_1   | Oncorhynchus mykiss      | Denmark  |         | 1      | 2      | 2      | 2      | 2      | 3      | 3      | 1      | 12222331        | 3  |
| 860813_17_1b | O mykiss                 | Denmark  |         | 1      | 2      | 2      | 2      | 2      | 3      | 3      | 1      | 12222331        | 3  |
| 910614_1_1   | Gadus morhua             | Denmark  |         | 1      | 2      | 2      | 2      | 2      | 3      | 3      | 1      | 12222331        | 3  |
| ATCC14181    | Salmo trutta             | UK       |         | 1      | 2      | 2      | 2      | 2      | 3      | 3      | 1      | 12222331        | 3  |
| ATCC43305    | Oncorhynchus mykiss      | Denmark  |         | 2      | 3      | 3      | 3      | 3      | 4      | 3      | 2      | 23333432        | 4  |
| ATCC43306    | Gadus morhua             | Denmark  |         | 1      | 1      | 1      | 1      | 1      | 1      | 1      | 1      | 11111111        | 1  |
| ATCC43307    | Oncorhynchus mykiss      | Denmark  |         | 2      | 4      | 4      | 4      | 4      | 5      | 3      | 3      | 24444533        | 5  |
| ATCC43308    | Gadus morhua             | Denmark  |         | 1      | 5      | 5      | 5      | 5      | 6      | 3      | 4      | 15555634        | 6  |
| ATCC43309    | Gadus morhua             | Denmark  |         | 3      | 6      | 6      | 6      | 6      | 1      | 1      | 5      | 36166115        | 7  |
| ATCC43310    | Gadus morhua             | Denmark  |         | 4      | 6      | 6      | 7      | 7      | 2      | 4      | 4      | 46677244        | 8  |
| ATCC43311    | Anguilla anguilla        | Denmark  |         | 5      | 7      | 2      | 8      | 8      | 7      | 3      | 6      | 57288736        | 9  |
| ATCC43312    | Gadus morhua             | Denmark  |         | 1      | 8      | 7      | 9      | 7      | 8      | 5      | 7      | 18797857        | 10 |
| ATCC43313    | Gadus morhua             | Denmark  |         | 1      | 9      | 2      | 10     | 9      | 2      | 5      | 8      | 192109258       | 11 |
| ATCC43314    | Gadus morhua             | Denmark  |         | 6      | 6      | 8      | 8      | 10     | 8      | 3      | 9      | 668810839       | 12 |
| HI21412      | Gadus morhua             | Norway   |         | 7      | 3      | 2      | 11     | 11     | 9      | 3      | 1      | 7321111931      | 13 |
| HI21413      | Gadus morhua             | Norway   |         | 8      | 3      | 2      | 12     | 12     | 7      | 3      | 4      | 8321212734      | 14 |
| HI21414      | Gadus morhua             | Norway   |         | 8      | 3      | 2      | 12     | 12     | 7      | 3      | 4      | 8321212734      | 14 |
| HI21429      | Gadus morhua             | Norway   |         | 8      | 3      | 2      | 12     | 12     | 7      | 3      | 4      | 8321212734      | 14 |
| IU_01        | Dicentrarchus labrax     | Turkey   |         | 2      | 10     | 3      | 3      | 3      | 4      | 3      | 2      | 210333432       | 15 |
| IU_02        | Dicentrarchus labrax     | Turkey   |         | 2      | 3      | 3      | 9      | 13     | 4      | 3      | 2      | 233913432       | 16 |
| IU_03        | Dicentrarchus labrax     | Turkey   |         | 1      | 2      | 2      | 2      | 2      | 3      | 3      | 1      | 12222331        | 3  |
| IU_04        | Mugil cephalus           | Turkey   |         | 2      | 3      | 3      | 3      | 3      | 4      | 3      | 2      | 23333432        | 4  |
| IU_05        | Dicentrarchus labrax     | Turkey   |         | 2      | 3      | 3      | 3      | 3      | 4      | 3      | 2      | 23333432        | 4  |
| IU_07        | Dicentrarchus labrax     | Turkey   |         | 9      | 11     | 3      | 13     | 3      | 4      | 3      | 2      | 9113133432      | 17 |
| IU_08        | Dicentrarchus labrax     | Turkey   |         | 2      | 3      | 3      | 3      | 3      | 4      | 3      | 2      | 23333432        | 4  |
| IU_10        | Dicentrarchus labrax     | Turkey   |         | 2      | 3      | 3      | 14     | 3      | 4      | 3      | 2      | 233143432       | 18 |
| IU_11        | Thunnus thynnus          | Turkey   |         | 2      | 3      | 3      | 3      | 3      | 4      | 3      | 2      | 23333432        | 4  |
| IU_12        | Dicentrarchus labrax     | Turkey   |         | 2      | 3      | 3      | 3      | 3      | 10     | 3      | 10     | 233310310       | 19 |
| LMG13224     | Rotifer                  | Greece   |         | 10     | 12     | 6      | 15     | 14     | 1      | 6      | 11     | 1012615141611   | 20 |
| LMG13225     | Rotifer                  | Greece   |         | 10     | 12     | 6      | 15     | 14     | 1      | 6      | 11     | 1012615141611   | 20 |
| LMG13227     | Sparus aurata            | Greece   |         | 10     | 12     | 6      | 16     | 14     | 1      | 6      | 11     | 1012616141611   | 21 |
| N3A3_2       | Gadus morhua             | Scotland |         | 11     | 2      | 9      | 17     | 15     | 11     | 3      | 4      | 112917151134    | 22 |
| N8D10_8      | Gadus morhua             | Scotland |         | 11     | 2      | 9      | 17     | 15     | 11     | 3      | 4      | 112917151134    | 22 |
| NCIMB1873    | Oncorhynchus tshawytscha | USA      |         | 2      | 3      | 3      | 3      | 3      | 4      | 3      | 2      | 23333432        | 4  |
| NCIMB2129    | Oncorhynchus mykiss      | Norway   |         | 2      | 3      | 3      | 3      | 3      | 4      | 3      | 2      | 23333432        | 4  |
| NCIMB2130    | Pollachius virens        | Norway   |         | 1      | 1      | 2      | 2      | 2      | 2      | 2      | 4      | 11222224        | 23 |
| NCIMB2131    | Oncorhynchus mykiss      | Norway   |         | 2      | 3      | 3      | 3      | 3      | 4      | 3      | 2      | 23333432        | 4  |
| NCIMB2132    | Oncorhynchus mykiss      | Norway   |         | 2      | 3      | 3      | 3      | 3      | 4      | 3      | 2      | 23333432        | 4  |
| NCIMB2133    | Pollachius virens        | Norway   |         | 1      | 1      | 2      | 2      | 2      | 2      | 2      | 1      | 11222221        | 2  |
| NCIMB2167    | Oncorhynchus kisutch     | USA      |         | 12     | 13     | 10     | 18     | 16     | 12     | 7      | 12     | 121310181612712 | 24 |
| NCIMB2168    | Oncorhynchus kisutch     | USA      |         | 12     | 13     | 10     | 18     | 12     | 7      | 12     | 12     | 1213101812712   | 25 |
| NCIMB6       | Gadus morhua             | Norway   |         | 1      | 1      | 1      | 1      | 1      | 1      | 1      | 1      | 11111111        | 1  |
| NVI3379      | Scophthalmus maximus     | Norway   |         | 1      | 2      | 2      | 2      | 2      | 3      | 3      | 1      | 12222331        | 3  |
| NVI4299      | Gadus morhua             | Norway   |         | 1      | 1      | 2      | 2      | 2      | 2      | 2      | 1      | 11222221        | 2  |
| NVI4317      | Oncorhynchus mykiss      | Norway   |         | 2      | 3      | 3      | 3      | 3      | 4      | 3      | 13     | 233334313       | 26 |
| NVI4351      | Gadus morhua             | Norway   |         | 13     | 14     | 2      | 10     | 17     | 2      | 8      | 1      | 131421017281    | 27 |
| NVI4353      | Gadus morhua             | Norway   |         | 1      | 1      | 2      | 2      | 2      | 2      | 2      | 1      | 11222221        | 2  |
| NVI4590      | Gadus morhua             | Norway   |         | 1      | 1      | 2      | 2      | 2      | 2      | 2      | 1      | 11222221        | 2  |
| NVI4591      | Salmo salar              | Norway   |         | 1      | 2      | 2      | 2      | 2      | 3      | 3      | 1      | 12222331        | 3  |
| NVI4601      | Salmo salar              | Norway   |         | 1      | 2      | 2      | 2      | 2      | 3      | 3      | 1      | 12222331        | 3  |
| NVI4614      | Pollachius virens        | Norway   |         | 1      | 1      | 2      | 2      | 2      | 2      | 2      | 1      | 11222221        | 2  |
| NVI4631      | Salmo salar              | Norway   |         | 13     | 14     | 2      | 10     | 17     | 2      | 8      | 14     | 1314210172814   | 28 |
| NVI4750      | Gadus morhua             | Norway   |         | 1      | 1      | 2      | 2      | 2      | 2      | 2      | 1      | 11222221        | 2  |
| NVI4792      | Gadus morhua             | Norway   |         | 1      | 2      | 2      | 2      | 2      | 3      | 3      | 1      | 12222331        | 3  |
| NVI4845      | Gadus morhua             | Norway   |         | 13     | 14     | 2      | 10     | 17     | 2      | 3      | 14     | 1314210172314   | 29 |
| NVI5022      | Gadus morhua             | Norway   |         | 13     | 14     | 2      | 10     | 17     | 2      | 8      | 14     | 1314210172814   | 28 |
| NVI5031      | Gadus morhua             | Norway   |         | 1      | 2      | 2      | 2      | 2      | 3      | 3      | 1      | 12222331        | 3  |
| NVI5034      | Gadus morhua             | Norway   |         | 1      | 2      | 2      | 2      | 2      | 3      | 3      | 1      | 12222331        | 3  |
| NVI5039      | Gadus morhua             | Norway   |         | 13     | 14     | 2      | 10     | 17     | 2      | 3      | 14     | 1314210172314   | 29 |
| NVI5042      | Gadus morhua             | Norway   |         | 1      | 1      | 2      | 2      | 2      | 2      | 2      | 1      | 11222221        | 2  |
| NVI5043      | Gadus morhua             | Norway   |         | 1      | 1      | 2      | 2      | 2      | 2      | 2      | 1      | 11222221        | 2  |
| NVI5056      | Gadus morhua             | Norway   |         | 13     | 14     | 2      | 10     | 17     | 2      | 3      | 14     | 1314210172314   | 29 |
| NVI5064      | Pollachius virens        | Norway   |         | 1      | 2      | 2      | 2      | 2      | 3      | 3      | 1      | 12222331        | 3  |
| NVI5065      | Gadus morhua             | Norway   |         | 1      | 2      | 2      | 2      | 2      | 3      | 3      | 1      | 12222331        | 3  |
| NVI5067      | Gadus morhua             | Norway   |         | 1      | 1      | 2      | 2      | 2      | 2      | 2      | 1      | 11222221        | 2  |
| NVI5070      | Oncorhynchus mykiss      | Norway   |         | 1      | 2      | 2      | 2      | 2      | 3      | 3      | 1      | 12222331        | 3  |
| NVI5084      | Salmo salar              | Chile    |         | 14     | 13     | 10     | 19     | 18     | 12     | 7      | 15     | 141310191812715 | 30 |
| NVI5087      | Salmo salar              | Chile    |         | 14     | 13     | 10     | 19     | 18     | 12     | 7      | 15     | 141310191812715 | 30 |
| NVI5106      | Gadus morhua             | Norway   |         | 1      | 1      | 2      | 2      | 2      | 2      | 2      | 1      | 11222221        | 2  |
| NVI5121      | Gadus morhua             | Norway   |         | 13     | 14     | 2      | 10     | 17     | 2      | 3      | 14     | 1314210172314   | 29 |
| NVI5180      | Oncorhynchus mykiss      | Norway   |         | 2      | 3      | 3      | 3      | 3      | 4      | 3      | 2      | 23333432        | 4  |
| NVI5190      | Salmo salar              | Chile    |         | 14     | 13     | 10     | 19     | 18     | 12     | 7      | 15     | 141310191812715 | 30 |
| NVI5191      | Salmo salar              | Chile    |         | 14     | 13     | 10     | 19     | 18     | 12     | 7      | 15     | 141310191812715 | 30 |
| NVI5286      | Gadus morhua             | Norway   |         | 15     | 15     | 11     | 20     | 19     | 1      | 9      | 16     | 15151120191916  | 31 |
| NVI5356      | Gadus morhua             | Ireland  |         | 1      | 1      | 2      | 2      | 2      | 2      | 2      | 1      | 11222221        | 2  |
| NVI5543      | Gadus morhua             | Norway   |         | 1      | 1      | 2      | 2      | 2      | 2      | 2      | 1      | 11222221        | 2  |

Table continues on next page

| name_host_species_country            | ATatpA | ATftsZ | ATgapA | ATgyrB | ATmreB | ATpyrH | ATrpoA | ATtopA | sum AT                 | HT |
|--------------------------------------|--------|--------|--------|--------|--------|--------|--------|--------|------------------------|----|
| NVI5546_Gadus_morhua_Norway          | 1      | 1      | 2      | 2      | 2      | 2      | 2      | 1      | 1 1 2 2 2 2 1          | 2  |
| NVI5589_Salmo_salar_Norway           | 2      | 3      | 3      | 3      | 3      | 4      | 3      | 2      | 2 3 3 3 3 4 3 2        | 4  |
| NVI5918_Gadus_morhua_Norway          | 15     | 15     | 11     | 20     | 19     | 1      | 9      | 16     | 15 15 11 20 19 1 9 16  | 31 |
| NVI6036_Gadus_morhua_Norway          | 13     | 14     | 2      | 10     | 17     | 2      | 3      | 14     | 13 14 2 10 17 2 3 14   | 29 |
| NVI6037_Gadus_morhua_Norway          | 13     | 14     | 2      | 10     | 17     | 2      | 3      | 14     | 13 14 2 10 17 2 3 14   | 29 |
| NVI6078_Gadus_morhua_Norway          | 1      | 1      | 2      | 2      | 2      | 2      | 2      | 1      | 1 1 2 2 2 2 1          | 2  |
| NVI6099_Gadus_morhua_Norway          | 1      | 1      | 2      | 21     | 2      | 2      | 2      | 1      | 1 1 2 21 22 2 1        | 32 |
| NVI6100_Gadus_morhua_Norway          | 1      | 1      | 2      | 2      | 2      | 2      | 2      | 1      | 1 1 2 2 2 2 1          | 2  |
| NVI6168_Gadus_morhua_Norway          | 1      | 1      | 2      | 2      | 2      | 2      | 2      | 1      | 1 1 2 2 2 2 1          | 2  |
| NVI6243_Gadus_morhua_Norway          | 1      | 1      | 2      | 2      | 2      | 2      | 2      | 1      | 1 1 2 2 2 2 1          | 2  |
| NVI6258_Oncorhynchus_mykiss_Norway   | 2      | 3      | 3      | 3      | 3      | 4      | 3      | 17     | 2 3 3 3 3 4 3 17       | 33 |
| NVI6273_Gadus_morhua_Norway          | 1      | 1      | 2      | 2      | 2      | 2      | 2      | 1      | 1 1 2 2 2 2 1          | 2  |
| NVI6331_Gadus_morhua_Ireland         | 1      | 1      | 2      | 2      | 2      | 2      | 2      | 1      | 1 1 2 2 2 2 1          | 2  |
| NVI6396_Gadus_morhua_Norway          | 1      | 1      | 2      | 2      | 2      | 2      | 2      | 1      | 1 1 2 2 2 2 1          | 2  |
| NVI6398_Gadus_morhua_Norway          | 1      | 1      | 2      | 2      | 2      | 2      | 2      | 1      | 1 1 2 2 2 2 1          | 2  |
| NVI6401_Gadus_morhua_Norway          | 1      | 2      | 2      | 2      | 2      | 3      | 3      | 1      | 1 2 2 2 3 3 1          | 3  |
| NVI6404_Gadus_morhua_Norway          | 1      | 2      | 2      | 2      | 2      | 3      | 3      | 1      | 1 2 2 2 3 3 1          | 3  |
| NVI6409_Gadus_morhua_Norway          | 13     | 14     | 2      | 10     | 17     | 2      | 3      | 14     | 13 14 2 10 17 2 3 14   | 29 |
| NVI6419_Gadus_morhua_Norway          | 1      | 1      | 2      | 2      | 2      | 2      | 2      | 1      | 1 1 2 2 2 2 1          | 2  |
| VIB266A_Rotifer_Australia            | 5      | 3      | 2      | 22     | 20     | 9      | 3      | 18     | 5 3 2 22 20 9 3 18     | 34 |
| VIB266B_Rotifer_Australia            | 2      | 3      | 3      | 3      | 3      | 4      | 3      | 2      | 2 3 3 3 3 4 3 2        | 4  |
| Se_1.1_Sediment_Denmark              | 1      | 2      | 2      | 2      | 2      | 3      | 3      | 1      | 1 2 2 2 3 3 1          | 3  |
| VIB127_Oncorhynchus_mykiss_Italy     | 1      | 3      | 12     | 23     | 21     | 13     | 4      | 4      | 1 3 12 23 21 13 4 4    | 35 |
| VIB149_Water_Denmark                 | 9      | 3      | 13     | 24     | 22     | 8      | 3      | 19     | 9 3 13 24 22 8 3 19    | 36 |
| VIB253_Oncorhynchus_mykiss_Australia | 16     | 3      | 3      | 3      | 3      | 4      | 10     | 2      | 16 3 3 3 3 4 10 2      | 37 |
| VIB605_Plecoglossus_altivelis_Japan  | 2      | 3      | 3      | 3      | 3      | 4      | 3      | 2      | 2 3 3 3 3 4 3 2        | 4  |
| VIB64_Scopthalmus_maximus_Spain      | 2      | 3      | 3      | 3      | 3      | 4      | 3      | 2      | 2 3 3 3 3 4 3 2        | 4  |
| VIB77_Plecoglossus_altivelis_Japan   | 1      | 16     | 14     | 25     | 23     | 9      | 3      | 1      | 1 16 14 25 23 9 3 1    | 38 |
| ATCC68554Vang775_O_mykiss_USA        | 2      | 17     | 3      | 3      | 3      | 4      | 3      | 2      | 2 17 3 3 3 4 3 2       | 39 |
| NBI0Vang_Oncorhynchus_mykiss_Sweden  | 2      | 3      | 3      | 3      | 3      | 4      | 3      | 2      | 2 3 3 3 3 4 3 2        | 4  |
| M3Lang_Paralichthys_olivaceus_China  | 2      | 3      | 3      | 3      | 3      | 4      | 3      | 2      | 2 3 3 3 3 4 3 2        | 4  |
| 96FVang_Morone_saxialis_USA          | 17     | 3      | 3      | 3      | 3      | 4      | 3      | 2      | 17 3 3 3 3 4 3 2       | 40 |
| RV22Vang_Scopthalmus_maximus_Spain   | 1      | 2      | 2      | 2      | 2      | 3      | 3      | 1      | 1 2 2 2 3 3 1          | 3  |
| I2B09Vord_filtered_seawater_USA      | 18     | 18     | 5      | 12     | 24     | 14     | 3      | 4      | 18 18 5 12 24 14 3 4   | 41 |
| FF93Vord_filtered_seawater_USA       | 19     | 19     | 15     | 26     | 25     | 15     | 4      | 20     | 19 19 15 26 25 15 4 20 | 42 |
| FF167Vord_filtered_seawater_USA      | 20     | 9      | 11     | 27     | 26     | 16     | 11     | 14     | 20 9 11 27 26 16 11 14 | 43 |
| FS144Vord_filtered_seawater_USA      | 18     | 18     | 5      | 12     | 24     | 14     | 3      | 4      | 18 18 5 12 24 14 3 4   | 41 |
| FS238Vord_filtered_seawater_USA      | 18     | 20     | 2      | 12     | 21     | 17     | 5      | 21     | 18 20 2 12 21 17 5 21  | 44 |

**Supplementary table 1.** All allele types (ATs) and haplotypes (HTs) assigned to the 116 *Vibrio anguillarum*-related isolates examined in the study.
